# Supplementary material for: A pH-ultrasensitive membranolytic polymer-assisted delivery system for enhanced siRNA delivery
Source: Royal Society of Chemistry journal article supplement (doi:10.1039/d5bm01235j), 2026-01-01
Supplement: d5bm01235j1.pdf [file d5bm01235j1.pdf]

## Supplementary Information

### A pH-Ultrasensitive Membranolytic Polymer-Assisted Delivery System for Enhanced siRNA Delivery

Yue Yu<sup>a,‡</sup>, Houbing Zhang<sup>b,‡</sup>, Xianzhu Yang<sup>b,c</sup>, Jun Wang<sup>b,c</sup>, Menghua Xiong<sup>b,d,\*</sup>,  
Xiaojiao Du<sup>a,c,\*</sup>

*<sup>a</sup>School of Medicine, South China University of Technology, Guangzhou 510006, P.R. China*

*<sup>b</sup>School of Biomedical Sciences and Engineering, South China University of Technology, Guangzhou International Campus, Guangzhou 511442, P.R. China*

*<sup>c</sup>National Engineering Research Center for Tissue Restoration and Reconstruction, South China University of Technology, Guangzhou 510006, P.R. China*

*<sup>d</sup>Guangdong Provincial Key Laboratory of Biomedical Engineering, South China University of Technology, Guangzhou 510006, P. R. China*

<sup>‡</sup>These authors contributed equally to this work.

\*Corresponding authors.

E-mail addresses: [duxjz@scut.edu.cn](mailto:duxjz@scut.edu.cn) (X. Du); [xiongmh@scut.edu.cn](mailto:xiongmh@scut.edu.cn) (M. Xiong)

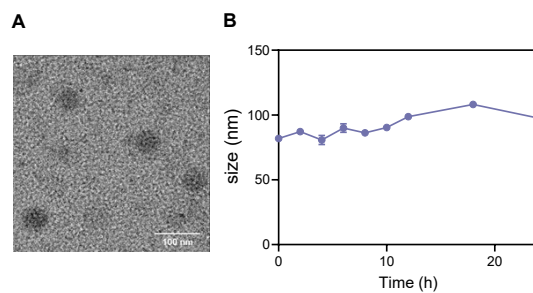

Figure S1. The characterization of NP<sub>Bn20</sub>/siRNA. (A) Morphology observed by TEM. (B) The average size of NP<sub>Bn20</sub>/siRNA incubated in PBS containing 10% FBS for different time periods ( $n = 3$ ).

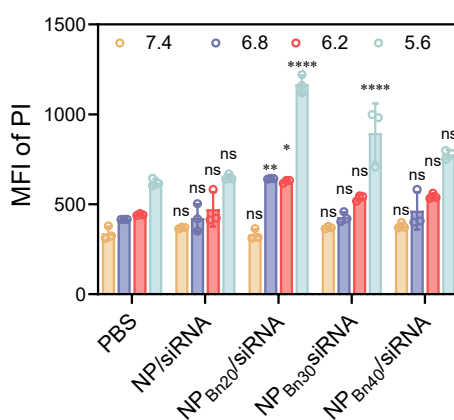

Figure S2. Quantitative analysis of membrane damage induced by NP/siRNA and NP<sub>BnX</sub>/siRNA following 2 hours of incubation with B16-F10 cells using flow cytometry with PI staining. Statistical significance was determined by comparing each formulation under identical pH conditions to the PBS control group. ns, not significant; \* $p < 0.05$ ; \*\* $p < 0.01$ ; \*\*\*\* $p < 0.0001$ .

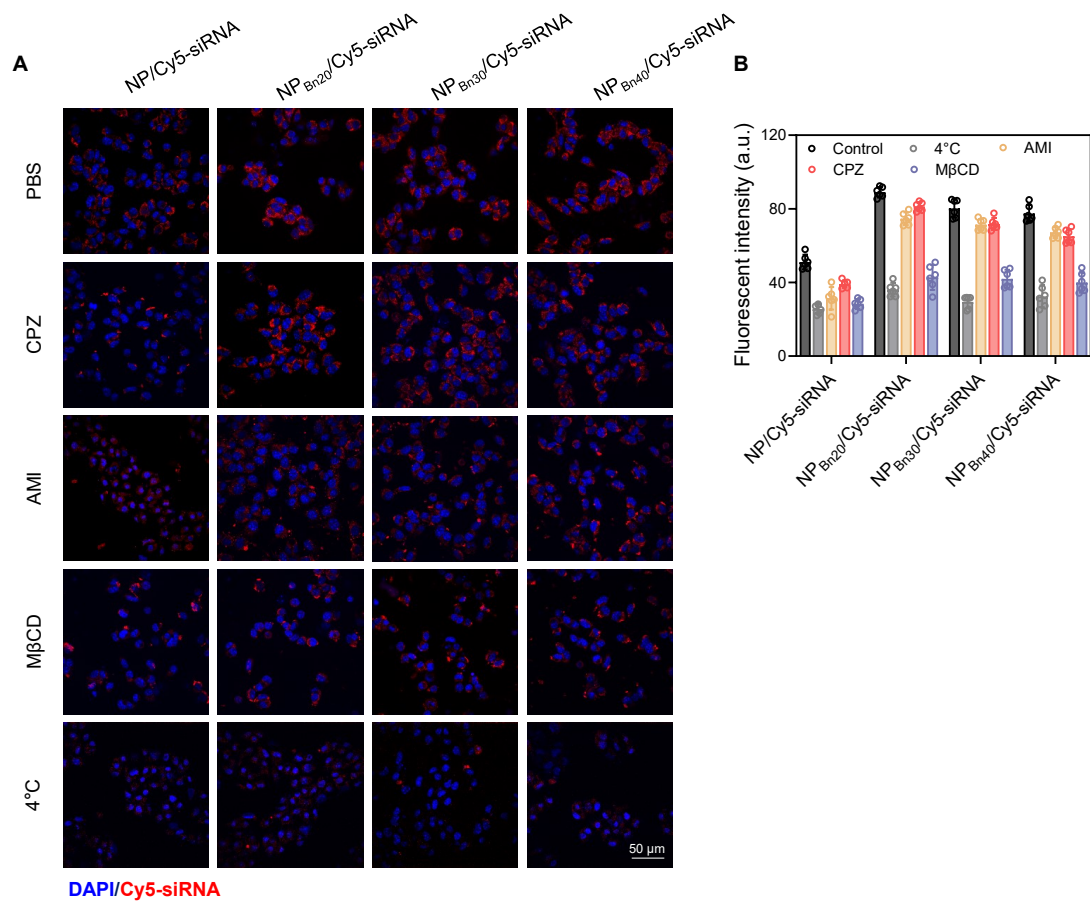

Figure S3. Cellular uptake of NP/Cy5-siRNA and NP<sub>BnX</sub>/Cy5-siRNA in B16-F10 cells pretreated with various inhibitors or incubated at 4°C. (A) Representative laser confocal scanning microscopy images; (B) Quantitative analysis of fluorescence intensity in the CLSM images.

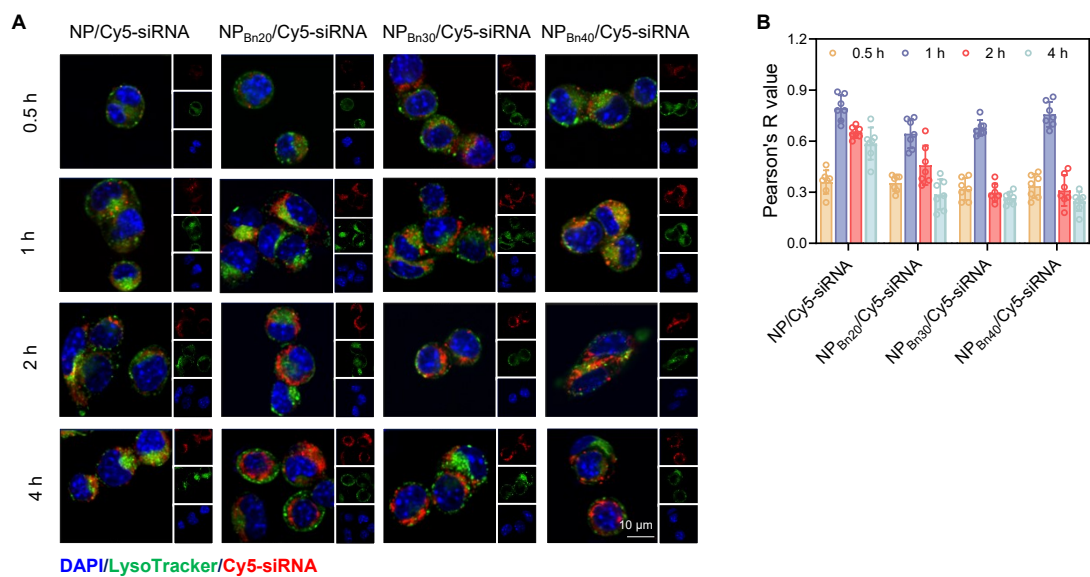

Figure S4. The colocalization of NP/Cy5-siRNA or NP<sub>BnX</sub>/Cy5-siRNA with lysosomes at different time points. (A) Representative laser confocal microscopy images; (B) Pearson correlation

coefficient.

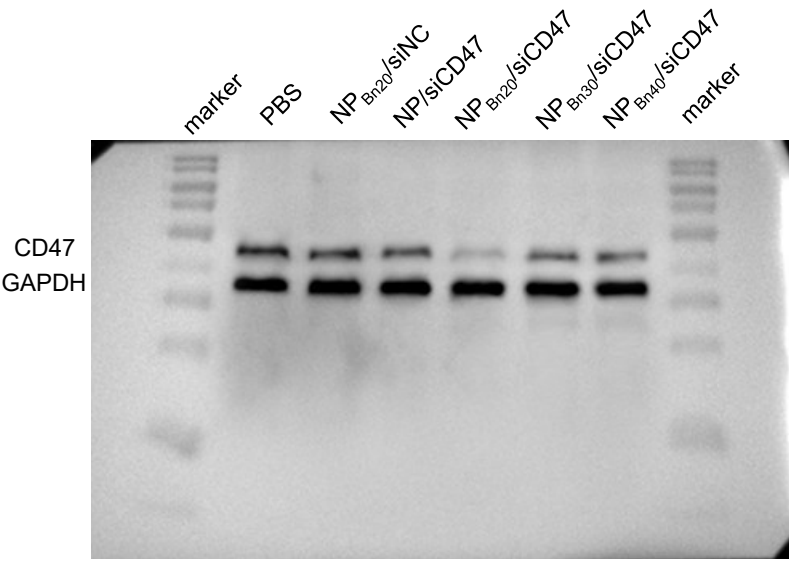

Figure S5. The uncropped and unprocessed western blot image analyzes the expression of CD47 in B16-F10 cells.

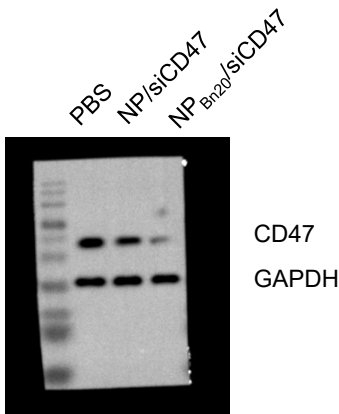

Figure S6. The uncropped and unprocessed Western blot image analyzes the expression of CD47 in tumor tissues.

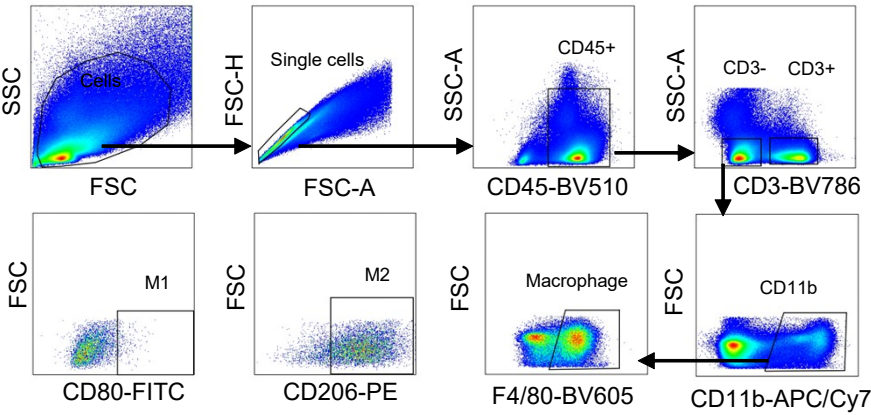

Figure S7. Flow cytometry gating strategy for M1-like macrophages (CD11b<sup>+</sup>F4/80<sup>+</sup>CD80<sup>+</sup>) and

M2-like macrophages (CD11b<sup>+</sup>F4/80<sup>+</sup>CD206<sup>+</sup>) in tumor tissues after treatments.
